# The American Journal of Psychiatry

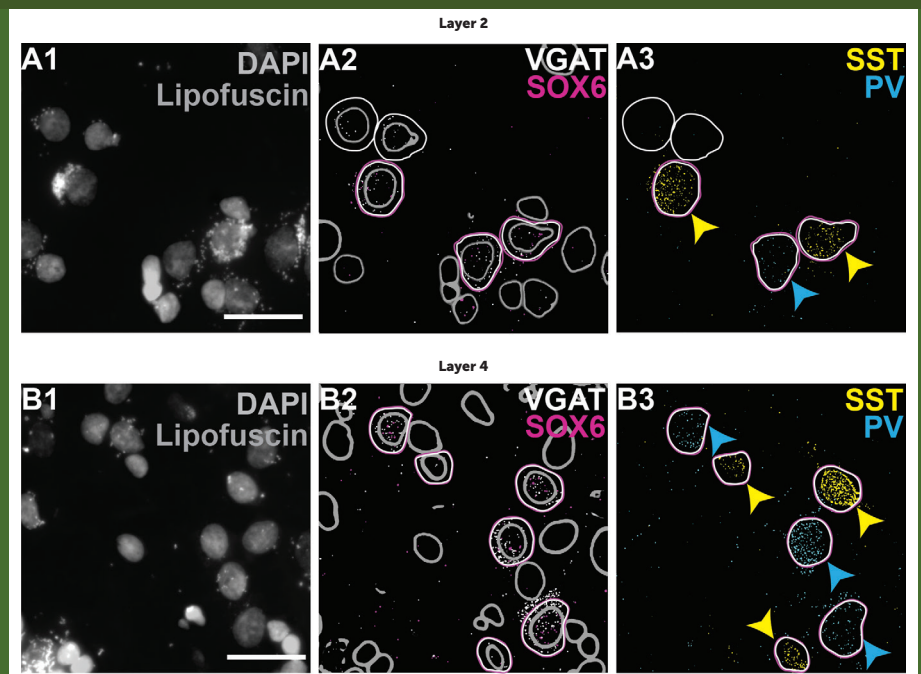

Recent Advances on Social Determinants of  
Mental Health: Looking Fast Forward

Differences in Social Determinants of Health Underlie  
Racial/Ethnic Disparities in Psychological  
Health and Well-Being

The Nature of Prefrontal Cortical GABA Neuron  
Alterations in Schizophrenia

Cerebral Small Vessel Disease Progression  
and the Risk of Dementia
